# Supplementary material for: Characterization of the radiative impact of aerosols on CO 2 and energy fluxes in the Amazon deforestation arch using Artificial Neural Networks
Source: Copernicus journal article supplement (doi:10.5194/acp-2019-167), 2019-06-07
Supplement: Supplementary file 1 [file acp-2019-167-supplement.pdf]

# Supplement material

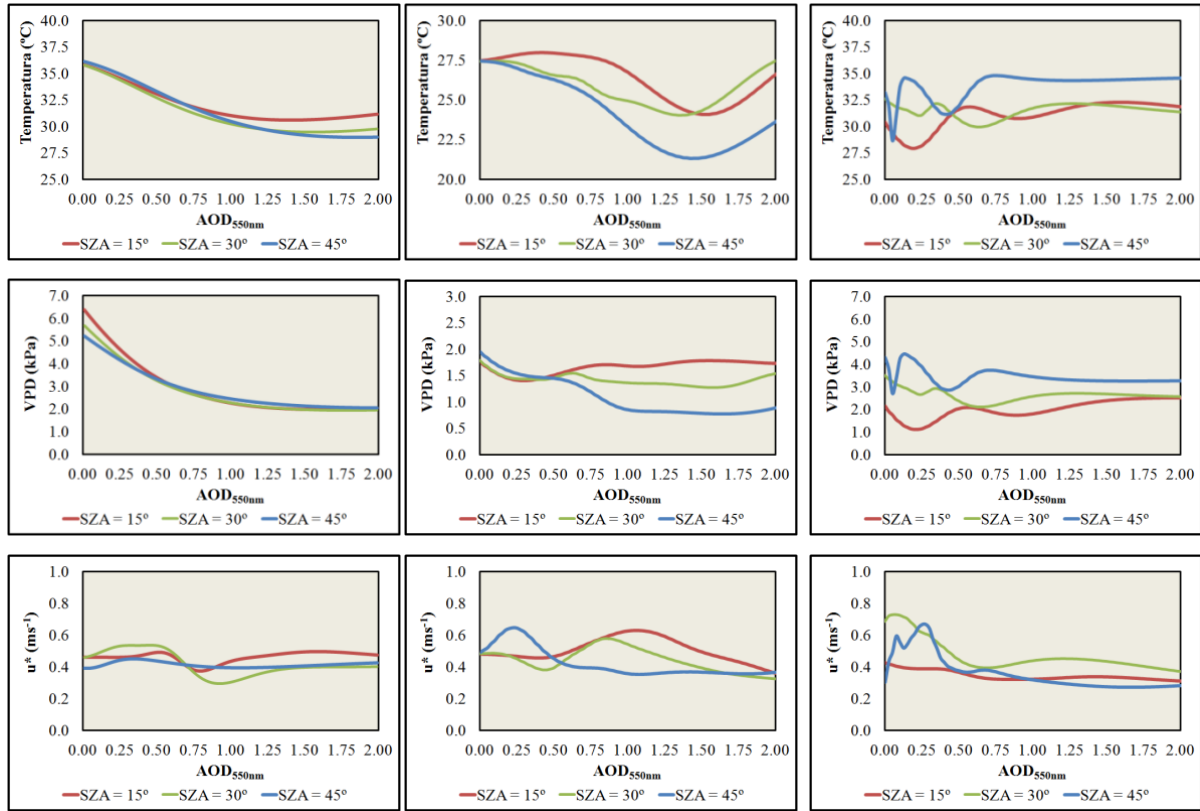

5

**a. Bananal Island - TO**

**b. Rebio Jaru - RO**

**c. Sinop - MT**

**Figure 1: Temperature (°C), VPD (kPa), and friction velocity ( $u^*$ ,  $ms^{-1}$ ) calculated through ANNs varying with  $AOD_{550nm}$ . ANNs were used with values of  $PAR_i$ ,  $PAR_{dir}$  generated by libRadtran, for three SZAs (15°, 30°, and 45°), for all three study sites.**

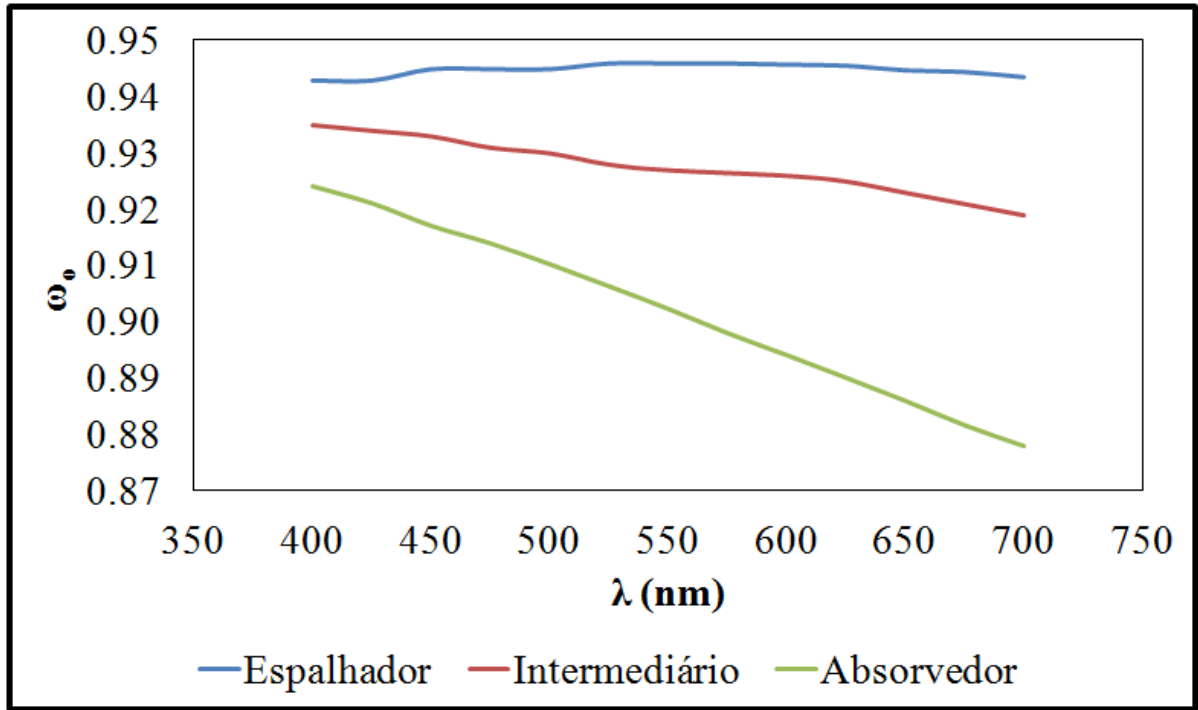

Figure 2: Spectral single scattering albedo ( $\omega_0$ ) as a function of the wavelength  $\lambda$  (nm), in three different types of aerosol: scattering, intermediate, and absorbing. These functions were developed based on the Mie theory from AERONET data for three study sites in the South of the Amazon basin (Rosário et al. (2011)).

5

Table 1: Statistical indices generated from the comparison between observed variables T, VPD and  $u^*$  (validation group) and the modelled ones by the ANNs, for all three experimental sites.

|                            | Bananal Island - TO |       |       | Rebio Jaru - RO |       |       | Sinop - MT |       |       |
|----------------------------|---------------------|-------|-------|-----------------|-------|-------|------------|-------|-------|
|                            | T                   | VPD   | $u^*$ | T               | VPD   | $u^*$ | T          | VPD   | $u^*$ |
| <b>Pearson coefficient</b> | 0.57                | 0.92  | 0.49  | 0.68            | 0.93  | 0.57  | 0.47       | 0.91  | 0.64  |
| <b>RMSE</b>                | 2.11                | 0.39  | 0.15  | 1.76            | 0.21  | 0.12  | 2.33       | 0.42  | 0.14  |
| <b>MAE</b>                 | 1.70                | 0.34  | 0.13  | 1.41            | 0.17  | 0.10  | 1.73       | 0.37  | 0.11  |
| <b>Relative deviation</b>  | 0.07%               | 1.19% | 0.65% | 0,22%           | 0.22% | 2.09% | 0.07%      | 0.13% | 0.02% |

10

**Table 2: FCO<sub>2</sub> generated from ANNs for the three study sites and respective errors associated with the validation data.**

|                           | <b>Ilha do Bananal - TO</b> | <b>Rebio Jaru - RO</b> | <b>Sinop - MT</b> |
|---------------------------|-----------------------------|------------------------|-------------------|
| <b>Number of Inputs</b>   | 330                         | 162                    | 237               |
| <i>Data</i>               |                             |                        |                   |
| <b>Mean</b>               | -7.1                        | -12.4                  | -17.3             |
| <b>Standard deviation</b> | 2.4                         | 5.0                    | 3.7               |
| <b>Maximum value</b>      | -1.2                        | 0.7                    | -9.7              |
| <b>Minimum value</b>      | -14.3                       | -22.5                  | -28.3             |
| <i>Coefficients</i>       |                             |                        |                   |
| <b>Pearson</b>            | 0.57                        | 0.82                   | 0.58              |
| <b>RMSE</b>               | 3.20                        | 4.29                   | 5.69              |
| <b>MAE</b>                | 2.43                        | 3.62                   | 4.78              |
